# Supplementary material
Source: PubMed Central journal article supplement (PMC5510875)
Supplement: NIHMS872680-supplement-supplement_1.pdf [file NIHMS872680-supplement-supplement_1.pdf]

**Table S1. Multiple Regression Analysis of the effect of HLA-C matching score on the outcomes after dUCB transplantation in endpoints that there was an interaction with conventional HLA-matching at -A,-B, and -DRB1 (OS & NRM).**

| Match at                       | HLA 2-4/6 |                |                 | HLA 5-6/6 |               |             |
|--------------------------------|-----------|----------------|-----------------|-----------|---------------|-------------|
|                                | N         | HR (95% CI)    | P-value         | N         | HR (95% CI)   | P-value     |
| <b>OVERALL SURVIVAL &amp;</b>  |           |                |                 |           |               |             |
| HLA-C match worst              |           |                |                 |           |               |             |
| 2/2*                           | 29        | 1.0 (ref)      |                 | 48        | 1.0 (ref)     |             |
| 1/2                            | 241       | 2.6 (1.3-5.4)  | <b>0.01</b>     | 70        | 0.8 (0.5-1.3) | 0.37        |
| 0/2                            | 119       | 3.1 (1.5-6.4)  | <b>&lt;0.01</b> | 8         | 0.3 (0.3-2.9) | 0.92        |
| Worst HLA-A,-B and -DRB1 Match |           |                |                 |           |               |             |
| 6/6*                           |           |                |                 | 24        | 1.0 (ref)     |             |
| 5/6                            |           |                |                 | 102       | 1.1 (0.5-2.)  | 0.92        |
| 4/6*                           | 256       | 1.0 (ref)      |                 |           |               |             |
| 3/6                            | 106       | 1.1 (0.8-1.5)  | 0.67            |           |               |             |
| 2/6                            | 27        | 0.8 (0.5-1.4)  | 0.48            |           |               |             |
| Age                            |           |                |                 |           |               |             |
| <18                            | 26        | 1.0 (ref)      |                 | 21        | 1.0 (ref)     |             |
| 18-34                          | 77        | 1.6 (0.7-3.3)  | 0.24            | 20        | 0.5 (0.2-1.2) | 0.10        |
| 35+                            | 286       | 2.7 (1.3-5.5)  | <b>0.01</b>     | 85        | 0.3 (0.1-0.7) | <b>0.01</b> |
| Disease Risk                   |           |                |                 |           |               |             |
| Standard risk*                 | 227       | 1.0 (ref)      |                 | 84        | 1.0 (ref)     |             |
| High risk                      | 162       | 1.6 (1.2-2.1)  | <b>&lt;0.01</b> | 42        | 1.1 (0.6-1.8) | 0.81        |
| Patient CMV                    |           |                |                 |           |               |             |
| Negative*                      | 158       | 1.0 (ref)      |                 | NA        |               |             |
| Positive                       | 231       | 1.7 (1.3-2.2)  | <b>&lt;0.01</b> | NA        |               |             |
| <b>Non-Relapse Mortality £</b> |           |                |                 |           |               |             |
| HLA-C match worst              |           |                |                 |           |               |             |
| 2/2*                           | 29        | 1.0 (ref)      |                 | 48        | 1.0 (ref)     |             |
| 1/2                            | 241       | 5.3 (1.3-22.1) | <b>0.02</b>     | 70        | 0.9 (0.4-2.0) | 0.82        |
| 0/2                            | 119       | 6.5 (1.5-27.2) | <b>0.01</b>     | 8         | 1.6 (0.3-7.8) | 0.57        |
| Worst HLA-A,-B and -DRB1 Match |           |                |                 |           |               |             |
| 6/6*                           |           |                |                 | 24        | 1.0 (ref)     |             |
| 5/6                            |           |                |                 | 102       | 1.2 (0.4-3.7) | 0.76        |
| 4/6*                           | 256       | 1.0 (ref)      |                 |           |               |             |
| 3/6                            | 106       | 0.9 (0.6-1.4)  | 0.62            |           |               |             |
| 2/6                            | 27        | 0.9 (0.5-2.0)  | 0.87            |           |               |             |
| Age                            |           |                |                 |           |               |             |
| <18                            | 26        | 1.0 (ref)      |                 | NS        | NS            | NS          |
| 18-34                          | 77        | 1.6 (0.8-3.6)  | 0.22            | NS        | NS            | NS          |

|                |     |               |                 |    |               |             |
|----------------|-----|---------------|-----------------|----|---------------|-------------|
| 35+            | 286 | 2.0 (1.0-4.2) | 0.06            | NS | NS            | NS          |
| Disease Risk   |     |               |                 |    |               |             |
| Standard risk* | 227 | 1.0 (ref)     |                 | 84 | 1.0 (ref)     |             |
| High risk      | 162 | 2.0 (1.4-2.8) | <b>&lt;0.01</b> | 42 | 1.6 (0.8-3.4) | 0.20        |
| Patient CMV    |     |               |                 |    |               |             |
| Negative*      | 158 | 1.0 (ref)     |                 | NS | NS            | NS          |
| Positive       | 231 | 1.6 (1.1-2.3) | <b>0.02</b>     | NS | NS            | NS          |
| Conditioning   |     |               |                 |    |               |             |
| MA*            | 123 | 1.0 (ref)     |                 | 54 | 1.0 (ref)     |             |
| RIC            | 266 | 0.3 (0.2-0.5) | <b>&lt;0.01</b> | 72 | 0.4 (0.2-0.9) | <b>0.02</b> |

HLA, human leukocyte antigen; dUCB, double umbilical cord blood; N, number of patients; CI, confidence interval; CMV, cytomegalovirus; MA, myeloablative conditioning; RIC, reduced intensity conditioning; GVHD, graft-vs-host disease.

\* Reference group

& Overall survival and disease-free survival among 4/6 + 4-6/6 were stratified by transplant center and intensity of the conditioning regimen, while for 5/6+-5-6/6 were stratified by transplant center

£ Stratified by transplant center

**Table S2. Multivariate analysis of the effect of HLA-C after dUCB transplantation in endpoints that there was NO interaction with conventional HLA-matching at –A,-B, and -DRB1 (Relapse).**

|                                   | N   | HR (95% Confidence interval) | P-value         |
|-----------------------------------|-----|------------------------------|-----------------|
| <b>RELAPSE £</b>                  |     |                              |                 |
| HLA-C match worst                 |     |                              |                 |
| 2/2*                              | 77  | 1.0 (ref)                    |                 |
| 1/2                               | 311 | 0.8 (0.5-1.3)                | 0.37            |
| 0/2                               | 127 | 0.9 (0.5-1.6)                | 0.77            |
| Worst HLA Match –A, -B, and –DRB1 |     |                              |                 |
| 6/6*                              | 24  | 1.0                          |                 |
| 5/6                               | 102 | 0.5 (0.3-1.1)                | 0.09            |
| 4/6                               | 256 | 0.6 (0.3-1.2)                | 0.14            |
| 3/6                               | 106 | 0.6 (0.3-1.2)                | 0.17            |
| 2/6                               | 27  | 0.5 (0.2-1.5)                | 0.22            |
| Disease Risk                      |     |                              |                 |
| Standard risk*                    | 311 | 1.0                          |                 |
| High risk                         | 204 | 1.1 (0.8-1.5)                | 0.70            |
| Conditioning                      |     |                              |                 |
| MA *                              | 166 | 1.0                          |                 |
| RIC                               | 349 | 2.9 (1.8-4.5)                | <b>&lt;0.01</b> |
| Grade II-IV aGVHD                 |     |                              |                 |
| No*                               | 305 | 1.0                          |                 |
| Yes                               | 210 | 0.6 (0.4-0.9)                | <b>0.01</b>     |

HLA, human leukocyte antigen; dUCB, double umbilical cord blood; N, number of patients; CI, confidence interval; MA, myeloablative conditioning; RIC, reduced intensity conditioning; GVHD, graft-vs-host disease.

\* Reference group

£ Stratified by transplant center
